1 **Prospective follow-up of New York City residents with e-cigarette, or vaping product use-**  
2 **associated lung injury—2020–2021**

3  
4 Short Title: **New York City residents with e-cigarette, or vaping product use associated**  
5 **lung injury**

6  
7  
8 Kathryn M. Tannert Niang, MPH<sup>1\*</sup>; Aviva B. Grasso, MPH<sup>1</sup>; Indira Debchoudhury, MPH<sup>1</sup>; Dena  
9 Bushman, MSN, MPH<sup>2,3^</sup>; John P. Jasek, MPA<sup>1</sup>; Monique A. Fairclough, MPH<sup>1</sup>; Katherine R.  
10 Van Oss, MD, MS<sup>3</sup>; Shadi Chamany, MD, MPH<sup>1</sup>; Kendall D. LaSane, MPH<sup>4</sup>, Sharraine M.  
11 Franklin<sup>1</sup>, Achala K. Talati, DO, MPH<sup>1</sup>

12  
13 <sup>1</sup> Center for Health Equity and Community Wellness, New York City Department of Health and  
14 Mental Hygiene, New York, United States of America

15 <sup>2</sup> Epidemic Intelligence Service, Division of Scientific Education and Professional Development,  
16 CDC, Atlanta, Georgia, United States of America

17 <sup>3</sup> Corewell Health, Women’s Health & Wellness Center, Grand Rapids, Michigan, United States  
18 of America

19 <sup>4</sup> Department of Health Policy and Management, University of North Carolina Gillings School of  
20 Global Public Health, Chapel Hill, North Carolina, United States of America

21  
22 \* Corresponding author

23 [ktannert@health.nyc.gov](mailto:ktannert@health.nyc.gov) (KTN)

24  
25 ^The findings and conclusions in this report are those of the authors and do not necessarily  
26 represent the official position of the Centers for Disease Control and Prevention.

## 27 **Abstract:**

28           **Background:** A multistate outbreak of e-cigarette, or vaping, product use-associated lung  
29 injury (EVALI) occurred in 2019. Because of EVALI’s novelty and severity, the New York City  
30 (NYC) Department of Health and Mental Hygiene (DOHMH) prospectively assessed sequelae  
31 among NYC residents who received an EVALI diagnosis in 2019.

32           **Methods:** Using existing NYC EVALI surveillance data, DOHMH attempted contact  
33 with all living residents who received an EVALI diagnosis in 2019 and conducted 3 waves of  
34 telephone interviews during April 2020–March 2021. Interview questions were adapted from the  
35 Centers for Disease Control and Prevention’s EVALI case report form and validated surveys.  
36 Baseline differences between respondents and nonrespondents were assessed with Chi-square  
37 and Fisher’s exact tests; clinical and behavioral characteristics and open-ended responses were  
38 summarized.

39           **Results:** In 2019, 53 NYC residents received an EVALI diagnosis; 33 (67%), 14 (29%),  
40 and 18 (37%) of 49 living residents participated in the first, second, and third interviews,  
41 respectively. Interviews occurred after outpatient diagnosis (6%) or hospital discharge (94%), at  
42 a median of 8, 11, and 17 months for each wave. Respondents (N = 33) and nonrespondents (N =  
43 16) did not differ by sex, age, hospitalization status or length. Respondents were mostly male  
44 (70%), had a median age of 23 years (range: 16–63 years), and all reported using vaping or e-  
45 cigarette products (vaping) with tetrahydrocannabinol (88%), nicotine (49%), or cannabidiol  
46 (9%) before diagnosis. Respiratory (first and second interviews) and gastrointestinal (third  
47 interviews) symptoms were most commonly reported. Sixteen respondents (49%) reported any  
48 new diagnosis during follow-up. Fifteen to 29% of respondents reported vaping at each  
49 interview; 58%–93% reported recent non-vaped cannabinoid use.

50           **Conclusion:** NYC residents with EVALI reported symptoms throughout the follow-up  
51 period, and approximately half reported newly diagnosed health conditions.

---

52

## 53 **Introduction**

54           In summer 2019, the Centers for Disease Control and Prevention (CDC), the Food and  
55 Drug Administration, and state and local health departments, including New York City (NYC)  
56 Department of Health and Mental Hygiene (DOHMH), began investigating reports of severe  
57 lung injuries among persons with a history of e-cigarette or vaping product use (vaping). During  
58 August 2019–February 2020, CDC reported 2,807 cases of e-cigarette, or vaping, product use-  
59 associated lung injury (EVALI) nationwide. This included 127 (5%) that were reported in New  
60 York State (NYS) during August 2019-February 2020.[1] During August–December 2019, NYS  
61 reported 113 cases, of which 53 (46%) were NYC residents and are the subject of this report.

62           CDC described patients from across the United States who received an EVALI diagnosis  
63 mostly were young adult males. These persons had vaped tetrahydrocannabinol (THC), nicotine,  
64 or other liquids (e-liquids), and experienced respiratory, gastrointestinal, and constitutional  
65 symptoms over the course of a few days to several weeks [1]. Because of reports of  
66 rehospitalization and death post-discharge from initial EVALI hospitalization, CDC’s guidance  
67 on standards of care evolved between the initial recognition of EVALI in August 2019, and  
68 January 2020, when management algorithms were updated. This guidance addressed patients’  
69 clinical readiness for hospital discharge, social support and access to mental health and substance  
70 use disorder services, best practices for medication adherence, and post-discharge medical  
71 follow-up, including with primary care providers and pulmonologists [2].

72           Despite the clinical severity of certain EVALI cases and concerns about the toxicity of  
73   vaping products more broadly, [3, 4] the long-term effects of EVALI are not well understood [2,  
74   5, 6]. Because of the novelty of EVALI and reports of rehospitalization and death, DOHMH  
75   prospectively assessed NYC residents who had received an EVALI diagnosis in 2019. Even with  
76   limited knowledge on sequelae of EVALI, we were able to assess changes in symptoms,  
77   concomitant diagnoses, healthcare usage, functional and financial consequences, and substance  
78   use over time, among this cohort of NYC residents.

79

## 80   **Methods**

### 81   **Data Sources**

82           In 2019, potential EVALI cases were identified through passive (reports to poison control  
83   centers, NYS Department of Health [DOH], and DOHMH) and active (syndromic) surveillance.  
84   At that time, each potential EVALI case was identified and classified using CDC’s 2019 Lung  
85   Injury surveillance case definitions [7]. Baseline EVALI surveillance data were collected from  
86   provider reports to the NYC Poison Control Center and patient medical records that were  
87   obtained directly from NYC hospitals. During April 2020–March 2021, we conducted 3 waves  
88   of telephone interviews with surviving NYC residents who had received an EVALI diagnosis in  
89   2019 to follow them over time; the list was confirmed with NYS DOH to ensure that all reported  
90   cases were included. Before each wave of interviews, a match with the NYC vital statistics death  
91   registry was conducted to assess for any recent deaths.

92           We conducted interviews in English or in respondent’s primary language (n = 1, in  
93   Mandarin) using a telephone interpreter service. NYC residents who received an EVALI  
94   diagnosis were called up to three times during each wave of interviews. For those not reached in

95 the first call attempt, we left voicemails and sent text messages or emails to help schedule  
96 interviews. We mailed letters to all persons not reached during the first interview wave,  
97 informing them of the surveillance project and requesting their participation. Approximately  
98 three months after completing the first wave of interviews, we initiated second interviews with  
99 the initial respondents. We also attempted to interview all nonrespondents from the first wave of  
100 calls who had not opted out of participation, completing abbreviated first interviews with those  
101 reached. After another three months, the final wave of interviews began, including only  
102 respondents with whom at least one previous interview had been completed (Fig 1).

103 **Fig 1: Enrollment and participation in NYC e-cigarette, or vaping, associated lung injury**  
104 **(EVALI) interviews, waves 1–3.**

105 Interview questions included age, sex assigned at birth, symptoms, health conditions,  
106 healthcare use, insurance coverage, substance use, functional, student, and employment status.  
107 Effects of EVALI on finances were mostly categorical and adapted from CDC’s EVALI case  
108 report form [8] and validated surveys. This included the NYC Community Health Survey, [9]  
109 Youth Risk Behavior Survey, [10] and National Survey on Drug Use and Health [11].  
110 Abbreviated interviews included a shorter set of primarily open-ended questions that covered the  
111 same content areas. At the end of each interview, we asked if respondents had anything else to  
112 share about their experience or consequences of their lung injury on their lives.

113 Information about hospitalization, including duration of stay and intubation status, were  
114 abstracted from medical records, along with sex, age, and race and ethnicity. We did not include  
115 interview questions about race and ethnicity, because we had intended to use NYS DOH case  
116 interview data from the initial outbreak. However, these data were missing for most NYC  
117 residents with an EVALI diagnosis, something we did not learn until the follow-up interviews

118 were already completed. Instead, we used electronic medical record data to supplement this  
119 information because provider reports, which were used to identify cases did not include race or  
120 ethnicity.

121 Data were stored in restricted access file folders on secure agency share drives. This  
122 activity was reviewed by CDC and DOHMH Institutional Review Boards and was determined to  
123 be non-research public health surveillance. This study was reviewed by CDC and was conducted  
124 consistent with federal law and CDC policy.<sup>1</sup>

## 125 **Data analyses**

126 Data from the first wave of interviews using the full interview form and data from those  
127 interviewed for the first time during the second wave using the abbreviated interview form, were  
128 merged and recoded as first interview. Open-ended responses from the abbreviated interviews  
129 were coded to match the categories from the full interview form, when possible. All three waves  
130 of interviews were coded as third interview, regardless of the number of prior interviews.  
131 Baseline differences between respondents and nonrespondents were assessed with Chi-square  
132 and Fisher's exact tests using SAS<sup>®</sup> version 9.4 (SAS Institute, Inc., Cary, North Carolina).  
133 Symptoms, health conditions, healthcare use, substance use patterns, functional status, and  
134 effects of EVALI on finances were also summarized for each wave of interviews. Symptom  
135 trends among the respondents who completed all three interviews were summarized to assess for  
136 resolution over time. Two investigators reviewed free text comments for additional themes and  
137 to provide context for the quantitative data. Because of missing data, race and ethnicity were not  
138 used in any analyses.

139

---

<sup>1</sup> 45 C.F.R. part 46, 21 C.F.R. part 56; 42 U.S.C. Sect. 241(d); 5 U.S.C. Sect. 552a; 44 U.S.C. Sect. 3501 et seq

## 140 **Results**

### 141 **Baseline characteristics**

142 In 2019, a total of 53 NYC residents received an EVALI diagnosis. Most were male  
143 (72%); median age was 23 years (range: 15–63 years). Four (8%) died of EVALI (Table 1).  
144 Decedents were mostly male (n = 3; 75%) and had a median age of 28 years (range: 17–34  
145 years). Two decedents had been hospitalized (mean = 13 days) and intubated; one decedent died  
146 at home, and one decedent presented to the emergency department in cardiac arrest and did not  
147 survive.

148 **Table 1: Demographic characteristics and hospitalization status among New York City residents who received a diagnosis of e-**  
 149 **cigarette, or vaping, associated lung injury (EVALI) in 2019**

| Characteristic                         | Decedents     |    | Non-Respondents vs Respondents    |    |                            |    |                                  | First interview* |    | Second interview** |    | Third interview** |    |
|----------------------------------------|---------------|----|-----------------------------------|----|----------------------------|----|----------------------------------|------------------|----|--------------------|----|-------------------|----|
|                                        |               |    | Nonrespondents<br>(never reached) |    | Respondents<br>(any round) |    | Nonrespondents<br>vs Respondents |                  |    |                    |    |                   |    |
|                                        | N = 4         | %  | N = 16                            | %  | N = 33                     | %  | P value                          | N = 33           | %  | N = 14             | %  | N = 18            | %  |
| <b>Sex</b>                             |               |    |                                   |    |                            |    | 0.70                             |                  |    |                    |    |                   |    |
| Male                                   | 3             | 75 | 12                                | 75 | 23                         | 70 |                                  | 23               | 70 | 11                 | 79 | 10                | 56 |
| Female                                 | 1             | 25 | 4                                 | 25 | 10                         | 30 |                                  | 10               | 30 | 3                  | 21 | 8                 | 44 |
| <b>Age</b>                             |               |    |                                   |    |                            |    |                                  |                  |    |                    |    |                   |    |
| Age (yrs) at diagnosis, median (range) | 28<br>(17–34) |    | 23<br>(15–39)                     |    | 23<br>(16–63)              |    |                                  | 23<br>(16–63)    |    | 25<br>(16–63)      |    | 28 (16 – 63)      |    |
| Age (yrs) groups at diagnosis          |               |    |                                   |    |                            |    | 0.723***                         |                  |    |                    |    |                   |    |
| 13–17                                  | 1             | 25 | 2                                 | 13 | 5                          | 15 |                                  | 5                | 15 | 2                  | 14 | 2                 | 11 |
| 18–24                                  | 1             | 25 | 8                                 | 50 | 13                         | 39 |                                  | 13               | 39 | 5                  | 36 | 4                 | 22 |
| 25–34                                  | 2             | 50 | 2                                 | 13 | 8                          | 24 |                                  | 8                | 24 | 3                  | 21 | 6                 | 33 |
| 35–44                                  | 0             | -- | 4                                 | 25 | 5                          | 15 |                                  | 5                | 15 | 3                  | 21 | 4                 | 22 |
| ≥45                                    | 0             | -- | 0                                 | -- | 2                          | 6  |                                  | 2                | 6  | 1                  | 7  | 2                 | 11 |
| <b>Insurance status</b>                |               |    |                                   |    |                            |    |                                  |                  |    |                    |    |                   |    |
| Employer-based or private              |               |    |                                   |    |                            |    |                                  | 18               | 55 | 10                 | 71 | 11                | 61 |



|                                                        |          |    |          |     |          |    |       |          |    |           |    |                |    |
|--------------------------------------------------------|----------|----|----------|-----|----------|----|-------|----------|----|-----------|----|----------------|----|
| Medicaid or Medicare                                   |          |    |          |     |          |    |       | 10       | 30 | 4         | 29 | 5              | 28 |
| Other                                                  |          |    |          |     |          |    |       | 4        | 12 | 0         | -- | 0              | -- |
| Uninsured                                              |          |    |          |     |          |    |       | 0        | -- | 0         | -- | 2              | 11 |
| <b>Employment status</b>                               |          |    |          |     |          |    |       |          |    |           |    |                |    |
| Employed                                               |          |    |          |     |          |    |       | 23       | 70 | 7         | 50 | 14             | 78 |
| Unemployed                                             |          |    |          |     |          |    |       | 8        | 24 | 7         | 50 | 4              | 22 |
| <b>Educational status</b>                              |          |    |          |     |          |    |       |          |    |           |    |                |    |
| Attending school                                       |          |    |          |     |          |    |       | 10       | 30 | 3         | 21 | 4              | 22 |
| <b>Time (months) from diagnosis to interview round</b> |          |    |          |     |          |    |       |          |    |           |    |                |    |
| Median (range)                                         |          |    |          |     |          |    |       | 8 (5–15) |    | 11 (9–15) |    | 17 (15 – 19.0) |    |
| <b>Hospitalization status</b>                          |          |    |          |     |          |    |       |          |    |           |    |                |    |
| Initially hospitalized                                 | 3        | 75 | 16       | 100 | 31       | 94 | 0.177 | 31       | 94 | 13        | 93 | 17             | 94 |
| Intubation                                             | 2        | 50 | 3        | 19  | 3        | 9  | 0.333 | 3        | 9  | 2         | 14 | 3              | 17 |
| Days hospitalized, median (range)                      | 9 (1–17) |    | 6 (1–30) |     | 7 (1–13) |    |       | 7 (1–13) |    | 9 (1–13)  |    | 7.5 (1 – 13)   |    |
| ≥7 days                                                | 1        | 25 | 4        | 25  | 15       | 46 | 0.122 | 15       | 45 | 7         | 50 | 10             | 56 |

\*Refers to the time between EVALI diagnosis/discharge and first interview

\*\*Refers to the 3 months before the interview round

\*\*\*By Fishers Exact Test

Missing Values were excluded from the table

## 151 **Interview participation and respondent demographics**

152 Interviews occurred from 5 to 19 months after initial hospitalization or injury, at a  
153 median of 8, 11, and 17 months for each interview wave. Among 49 potential respondents, 33  
154 (67%) completed the first interview (24 in the first wave and 9 during the second wave), 14  
155 (29%) completed the second interview, and 18 (37%) completed the third interview; overall, 33  
156 (67%) respondents completed  $\geq 1$  interview and 22 (45%) completed  $\geq 2$  interviews. Ten  
157 respondents (20%) completed interviews during all three waves (Fig 1).

158 Respondents (N = 33; 67%) and nonrespondents (N = 16; 33%) did not significantly  
159 differ by sex, age group at diagnosis, intubation status, hospitalization status, or length of  
160 hospitalization (Table 1). Respondents were mostly male (n = 23; 70%), had a median age of 23  
161 years (range: 16–63 years), were hospitalized (n = 31; 94%) for a median of 6 days (range: 0–13  
162 days), and were not intubated (n = 30; 91%). Approximately half of respondents reported that at  
163 the time of hospitalization or diagnosis they had employer-based or private health insurance (n =  
164 18; 55%). Race and ethnicity were incomplete for 16 of 49 surviving NYC residents who  
165 received an EVALI diagnosis in 2019 (33% of potential respondents) and data were not used.

166 In terms of substance use patterns, 100% of respondents reported vaping, with either  
167 tetrahydrocannabinol (THC) (88%), nicotine (49%), or cannabidiol (CBD) (9%) before diagnosis  
168 (Table 2). Some respondents (15%–29%) reported recent vaping at each interview, and most  
169 respondents (58%–93%) reported recent non-vaped (e.g., smoked or edible) cannabinoid use. A  
170 limited number of respondents reported smoking cigarettes (0%–6%) or other tobacco products  
171 (0%–11%).

172 **Table 2: Vaping, e-cigarette, and substance use among New York City e-cigarette, or vaping, associated lung injury (EVALI)**

173 **prospective follow-up respondents**

| Characteristic                                                                      | Prior to EVALI diagnosis |     | First interview* |    | Second interview** |    | Third interview** |    |
|-------------------------------------------------------------------------------------|--------------------------|-----|------------------|----|--------------------|----|-------------------|----|
|                                                                                     | N = 33                   | %   | N = 33           | %  | N = 14             | %  | N = 18            | %  |
| <b>Vaped or used e-cigarettes</b>                                                   | 33                       | 100 | 5                | 15 | 4                  | 29 | 3                 | 17 |
| Nicotine                                                                            | 16                       | 49  | 6                | 18 | 2                  | 14 | 2                 | 11 |
| Marijuana or THC                                                                    | 29                       | 88  | 2                | 6  | 2                  | 14 | 2                 | 11 |
| CBD                                                                                 | 3                        | 9   | 1                | 3  | 0                  | -- | 0                 | -- |
| <b>General substance use</b>                                                        |                          |     |                  |    |                    |    |                   |    |
| Cigarettes                                                                          |                          |     | 2                | 6  | 0                  | -- | 1                 | 6  |
| Other tobacco products                                                              |                          |     | 2                | 6  | 0                  | -- | 2                 | 11 |
| Hookah or Waterpipe                                                                 |                          |     | 1                | 3  | 1                  | 7  | 1                 | 6  |
| Non-Vaped Cannabinoids                                                              |                          |     | 19               | 58 | 13                 | 93 | 13                | 72 |
| Smoked or Dabbed                                                                    |                          |     |                  |    | 9                  | 64 | 7                 | 39 |
| Other substance (heroin; cocaine; methamphetamines; huffing [paint or glue]; other) |                          |     | 2                | 6  | 0                  | -- | 4                 | 22 |
| <b>Alcohol use</b>                                                                  |                          |     |                  |    |                    |    |                   |    |
| ≥ 1 drink in last 30 days                                                           |                          |     |                  |    | 9                  | 64 | 12                | 67 |
| Binge drank in last 30 days <sup>1</sup>                                            |                          |     |                  |    | 1                  | 7  | 3                 | 17 |

\*Refers to the time between EVALI diagnosis and discharge and first interview.

\*\*Refers to the 3-month period before the interview.

<sup>1</sup>Binge refers to ≥4 drinks in a row for females, ≥5 drinks in a row for males.

Missing values were excluded from the table.

## 175 Preexisting and Newly Diagnosed Health Conditions

176 Respondents reported preexisting mental health conditions (49%), including anxiety  
 177 (36%), depression (24%) and other conditions (15%); asthma (27%), cardiovascular (12%)  
 178 conditions, including hypertension, hyperlipidemia, and heart disease; and diabetes (3%). At first  
 179 interview, respondents reported receiving new diagnoses of anxiety (27%), depression (15%),  
 180 other mental health conditions (3%), asthma (9%), other respiratory (3%) or cardiovascular (9%)  
 181 conditions, and diabetes (3%) (Table 3). Overall, 16 respondents (49%) reported receiving a new  
 182 diagnosis during the follow-up period.

183 **Table 3: Clinical characteristics and effects of e-cigarette, or vaping, associated lung injury**  
 184 **(EVALI) diagnosis among respondents**

| Characteristic                                                                                                     | Before EVALI diagnosis |    | First interview* |    | Second interview** |    | Third interview** |    |
|--------------------------------------------------------------------------------------------------------------------|------------------------|----|------------------|----|--------------------|----|-------------------|----|
|                                                                                                                    | N = 33                 | %  | N = 33           | %  | N = 14             | %  | N = 18            | %  |
| <b>Symptoms</b>                                                                                                    |                        |    |                  |    |                    |    |                   |    |
| Chest pain                                                                                                         | 1                      | 3  | 7                | 21 | 1                  | 7  | 4                 | 22 |
| Constitutional (fevers, tiredness, decreased appetite)                                                             | 3                      | 9  | 11               | 33 | 2                  | 14 | 5                 | 28 |
| Gastrointestinal (nausea, vomiting, diarrhea, bloating, or abdominal pain)                                         | 3                      | 9  | 10               | 30 | 4                  | 29 | 9                 | 50 |
| Headache                                                                                                           | 7                      | 21 | 10               | 30 | 3                  | 21 | 5                 | 28 |
| Mental health (little interest, depressed, bipolar symptoms, anxiety, anger, panic, insomnia, or survivor's guilt) | 4                      | 12 | 6                | 18 | 5                  | 36 | 6                 | 33 |
| Respiratory (SOB, pleuritic chest pain, or cough)                                                                  | 4                      | 12 | 17               | 52 | 7                  | 50 | 4                 | 22 |
| Other symptoms (hair loss, muscle atrophy, loss of singing voice, or other)                                        | 0                      | -- | 3                | 9  | 1                  | 7  | 2                 | 11 |
| <b>Health conditions<sup>1</sup></b>                                                                               |                        |    |                  |    |                    |    |                   |    |

|                                                                     |    |    |    |    |    |    |    |    |
|---------------------------------------------------------------------|----|----|----|----|----|----|----|----|
| Behavioral (ADD, ADHD, Anxiety, Depression, PTSD, or substance use) | 16 | 49 | 9  | 27 | 2  | 14 | 0  | -- |
| Anxiety                                                             | 12 | 36 | 9  | 27 | 1  | 7  | 0  | -- |
| Depression                                                          | 8  | 24 | 5  | 15 | 0  | -- | 0  | -- |
| Other                                                               | 5  | 15 | 1  | 3  | 1  | 7  | 0  | -- |
| Cardiovascular (high blood pressure, cholesterol, or heart disease) | 4  | 12 | 3  | 9  | 2  | 14 | 1  | 6  |
| COVID-19                                                            |    |    | 1  | 3  | 0  | -- | 1  | 6  |
| Diabetes                                                            | 1  | 3  | 1  | 3  | 0  | -- | 0  | -- |
| Respiratory (Sleep apnea, asthma, or COPD)                          | 9  | 27 | 4  | 12 | 1  | 7  | 0  | -- |
| Asthma                                                              | 9  | 27 | 3  | 9  | 1  | 7  | 0  | -- |
| Other (other conditions, arthritis, or chronic headaches)           | 7  | 21 | 3  | 9  | 3  | 21 | 1  | 6  |
| <b>Health care utilization ≥1 visit</b>                             |    |    |    |    |    |    |    |    |
| Any healthcare provider                                             |    |    | 30 | 91 | 13 | 93 | 15 | 83 |
| Cardiologist                                                        |    |    | 5  | 46 | 1  | 7  | 2  | 11 |
| Dentist                                                             |    |    | 2  | 6  | 1  | 7  | 1  | 6  |
| Mental health provider                                              |    |    | 4  | 12 | 6  | 43 | 3  | 17 |
| Primary care provider                                               |    |    | 18 | 55 | 4  | 29 | 9  | 50 |
| Pulmonologist                                                       |    |    | 27 | 79 | 2  | 14 | 1  | 6  |
| Urgent Care provider                                                |    |    | 3  | 9  | 2  | 14 | 2  | 11 |
| Other health care provider                                          |    |    | 3  | 9  | 6  | 43 | 6  | 33 |
| <b>Medication use</b>                                               |    |    |    |    |    |    |    |    |
| Corticosteroid use                                                  |    |    | 23 | 70 | 0  | -- | 0  | -- |
| <b>Effects</b>                                                      |    |    |    |    |    |    |    |    |
| Help with personal care needs                                       |    |    | 4  | 12 | 2  | 14 | 0  | -- |
| Help with routine needs                                             |    |    | 9  | 27 | 1  | 7  | 2  | 11 |
| Financial problems                                                  |    |    | 10 | 30 | 0  | -- | 1  | 6  |

<sup>1</sup>Refers to that health condition being newly diagnosed in the period noted below for first interview, second interview, and third interview.

\*Refers to the time between EVALI hospitalization discharge (for those hospitalized) or diagnosis (for those not hospitalized) and first interview.

\*\*Refers to the 3month period before the interview.

Missing values were excluded from the table

185

186 **Symptoms**

187           Between EVALI diagnosis and first interview, and during the three months before the  
188 second wave of interviews, respiratory symptoms were commonly reported (50%); however,  
189 gastrointestinal symptoms were most commonly reported (50%) during the three months before  
190 the third wave of interviews.

191           Among the 10 respondents who completed all three interviews, gastrointestinal  
192 symptoms were the most common (60%), and half (30%) remained unresolved by the third  
193 interview (Fig 2). Similarly, approximately half of respiratory, constitutional, and chest pain  
194 symptoms remained unresolved by the third interview.

195 **Fig 2. New symptoms after receiving EVALI diagnosis among the respondents who**  
196 **participated in all three interviews.**

197 \*Mental health includes attention deficit disorder (ADD), attention deficit hyperactivity disorder  
198 (ADHD), anxiety, depression, or post-traumatic stress disorder (PTSD); respiratory includes  
199 sleep apnea, asthma, or chronic obstructive pulmonary disorder; constitutional includes fevers,  
200 tiredness, or decreased appetite; and gastrointestinal includes nausea, vomiting, diarrhea,  
201 bloating, or abdominal pain.  
202

## 203 **Effects on personal function and finances**

204           In the months after an EVALI diagnosis, nine of 33 respondents (27%) required help with  
205 routine needs such as everyday household chores, four (12%) required help with personal care  
206 such as bathing or eating, and 10 (30%) reported financial problems because of EVALI. By the  
207 third wave of interviews, only two (11%) respondents reported requiring help with routine needs,  
208 no respondents required help with personal care, and one (6%) respondent reported recent  
209 financial problems because of EVALI.

210           Most (70%, n = 23) respondents were employed and 33% (n = 11) were in school when  
211 diagnosed. All students returned to school or graduated, and 74% of those employed (n = 17)  
212 returned to the same job after their diagnosis. Nine (53%) of those who returned to the same job  
213 missed from one week to one month of work; 35% (n = 6) missed one week of work or less; and

214 6% (n = 1) missed from one to three months of work. Accommodations were made for 18% (n =  
215 3) on return to work and 30% (n = 3) on return to school.

## 216 **Healthcare use**

217 Between diagnosis or hospital discharge and first interview, 91% of respondents had  
218 received treatment by a health care provider, most often a pulmonologist (79%) or an ambulatory  
219 primary care provider (55%). Respondents continued to interact with health care providers, with  
220 93% and 83% receiving treatment from healthcare providers during the three months preceding  
221 second and third interviews respectively; they most frequently visited mental health providers  
222 (43% and 17%) and primary care providers (29% and 50%) during this time frame.

## 223 **Respondent commentary on EVALI**

224 Qualitative responses were received from 23 (70%) of the 33 study respondents, nine  
225 (40%) of whom were female. During the three waves of interviews, 14 (52%) respondents  
226 commented once, nine (39%) commented twice and two (8%) commented during all three  
227 interviews. This provided a total of 36 statements addressing current concerns, recovery, and  
228 long-term health outcomes (data not shown).

229 During the three interview waves, 10 of 23 respondents (43.5%) noted change in outlook  
230 about e-cigarette or vaping product use, specific product types, or health risks. Six respondents  
231 (26%) stated that they had stopped e-cigarette or vaping product use. However, three (13%)  
232 continued to report smoking cannabis, use of what they termed natural products or obtaining  
233 products from a medical cannabis dispensary. Eight (34.7%) respondents suggested they had  
234 recovered, five (22%) suggested they were still experiencing symptoms from injury or treatment.  
235 Four (18%) suggested the experience had been traumatizing and six (26%) expressed variable

236 thoughts about the lack of effect their injury had on friends, lack of regulation, the need for  
237 provider education, or had no other significant concerns.

## 238 **Discussion**

239 Respondents reported symptoms throughout the follow-up period, and approximately half  
240 reported new-onset morbidity. Although many symptoms resolved, especially during the latter  
241 part of the follow-up period, our qualitative findings indicate that changes to vaping behavior  
242 and mindset endured. The periodic interviews allowed us to collect data regarding symptoms,  
243 and effects on education and employment, although the COVID-19 pandemic likely played a role  
244 in some of the mental health symptoms and employment challenges reported.

245 CDC's clinical guidance recommends outpatient primary care or pulmonary specialist  
246 follow up, optimally within 48 hours of discharge, and social support and access to mental health  
247 and substance use disorder services [12]. Although many of our respondents received a diagnosis  
248 before the October 2019 guidance release, overall treatment was consistent with this guidance.  
249 Almost all respondents had been treated by  $\geq 1$  health care providers by their first interview. Per  
250 CDC, cardiac disease, chronic pulmonary disease, diabetes, and older age were risk factors for  
251 higher morbidity and mortality among those who received an EVALI diagnosis. Nationwide,  
252 anxiety, depression, attention deficit disorder (ADD), attention deficit hyperactivity disorder  
253 (ADHD), and other mental and behavioral health conditions were common among EVALI  
254 patients [2, 13]. Our findings were consistent with CDC's nationwide findings; however, the  
255 mortality rate in NYC (7.5%) among those who received a diagnosis in 2019 was higher than the  
256 national rate (2.4%), which included cases through February 2020.

257 Approximately half (49%) of respondents had preexisting behavioral health conditions.  
258 The rate of preexisting depression in our cohort (24%) was approximately three times the overall



259 rate in NYC (9%).[14] National survey data suggest that self-medication (e.g., use of alcohol,  
260 cannabis, or nicotine to address anxiety) for mental health conditions is not uncommon [15].  
261 Approximately half of respondents reported new diagnoses for other physical or behavioral  
262 health conditions during the follow-up period. The possibility exists that some of these new  
263 diagnoses were preexisting, but undiagnosed conditions. Young adults generally use the health  
264 care system less than other age groups overall, but have higher rates of emergency department  
265 use [16]. Our findings indicate that closer medical follow-up after EVALI may have facilitated  
266 additional diagnoses and improved care. EVALI might have also been a contributing factor to  
267 some of the newly diagnosed behavioral health and respiratory conditions. Fewer than half of our  
268 respondents were treated by mental health providers. However, supporting recovery from  
269 EVALI will require some degree of mental health follow-up and substance use treatment to  
270 reduce the risk for reinjury or other secondary pulmonary complications. More consistent use of  
271 outpatient services for young adults might also prevent or reduce severity of future EVALI cases.

272 Two other published studies have looked at long-term outcomes after EVALI. Blagev et  
273 al tracked 73 patients in Utah through medical records abstraction and conducted clinical  
274 screening activities at 12-months post-diagnosis [17]. Triantafyllou et al retrospectively reviewed  
275 electronic medical records of 41 patients who received an EVALI diagnosis and admitted to any  
276 of the University of Pittsburgh Medical Center hospitals [18]. Both studies reported similar age  
277 and sex distributions, rates of behavioral health and cardiovascular disease, and proportions of  
278 respondents using e-cigarettes with THC or nicotine, consistent with our interview findings.  
279 Blagev et al and our interviews reported similar median lengths of stay in the hospital (5 and 6  
280 days respectively). Our findings contribute prospective data from a third jurisdiction at multiple  
281 timepoints on the physical, mental, and functional health of respondents, and social effects. One

282 main difference between our findings and those from the other two studies is that Triantafyllou et  
283 al included hospital admissions through September 2020 and Blagev et al included diagnoses  
284 through August 2021. However, our respondents all received an EVALI diagnosis in 2019. Thus,  
285 our time frame excluded the potential for COVID-19 to be a factor in the initial hospitalization  
286 and case identification. In addition, compared with Triantafyllou et al, a higher proportion of our  
287 respondents reported a history of asthma (27% vs 8%). Among our respondents, although only  
288 some reported continued vaping (15%–29% across waves), most reported using non-vaped  
289 cannabinoids, often by smoking or dabbing (i.e., inhaling a smoked or aerosolized concentrated  
290 cannabis resin). Participants in the Blagev et al study were more likely to report nicotine  
291 consumption (vaped and smoked) and cannabis vaping after receiving their EVALI diagnosis  
292 than our respondents.

## 293 **Limitations**

294 The limited number of potential respondents ( $n = 48$ ) and the nonresponse rate (32%)  
295 suggests that the findings might not have captured the full range of post-discharge health  
296 sequelae among the potential respondents. However, respondents and nonrespondents did not  
297 differ by sex, age, initial hospitalization status, or length of stay. Economic or other  
298 circumstantial differences imposed by the COVID-19 pandemic might have been a barrier to  
299 participation or with ongoing follow-up. The conclusions also involved self-reported findings  
300 from a local municipal population, which cannot be generalized to the broader population  
301 affected by EVALI, especially given the variable state and local regulatory environment for  
302 cannabis and e-cigarettes. A robust effort was made to abstract race and ethnicity information  
303 from available electronic health records; however, these data were found to be incomplete and  
304 inadequate for identifying associated disparities [19]. Although the interviews were confidential

305 and used nonjudgmental survey questions administered by experienced interviewers, they were  
306 not anonymous. The possibility exists that some persons responded to the surveys based on  
307 perceptions of social desirability, need to share their story for benefit of others, or to affirm a  
308 positive outcome with their health. Because of DOHMH staffing constraints during the  
309 pandemic, some respondents also did not speak with the same investigator each time.

## 310 **Public Health Implications**

311 Limited regulation and oversight of new consumer products, including ingredients in  
312 nicotine and cannabis products, contributed to the EVALI outbreak.[20] These products continue  
313 to evolve, which presents a challenge to the development and communication of health risk  
314 information. Ongoing surveillance is particularly crucial, because cannabis was legalized for  
315 adult use in NYS in 2021, and new products continue to emerge. Although vitamin E acetate has  
316 been identified as a contributor to EVALI, certain respondents vaped only nicotine products  
317 before receiving a diagnosis, which are not known to contain vitamin E acetate. Consistent with  
318 the conclusion reached by other researchers, we lack sufficient information about vaping product  
319 constituents and excipients involved in each lung injury to provide specific new warning to the  
320 public or establish more protective regulations for manufacturers.<sup>1</sup>

321 Given the rapid evolution of products, periodic follow-up with a group of consumers  
322 might help supplement other traditional modes of surveillance. For example, one respondent  
323 inquired about risks for nicotine-free vaping products being marketed as wellness products or  
324 personal diffusers, which claimed to deliver essential oils. This led NYC DOHMH to update  
325 communications for the public, retailers, and clinicians to include these products.

326 NYC DOHMH maintains some active and passive surveillance of EVALI, identifying  
327 approximately three or four cases of EVALI per month. As the COVID-19 pandemic progressed

328 during spring of 2020, we noted that the clinical assessment of patients began to evolve, often  
329 with repeated COVID-19 testing, which highlighted the continued challenge of recognizing and  
330 diagnosing EVALI. Detailed substance use histories often led to the ultimate diagnosis and  
331 appropriate treatment. Subsequently, state and local agencies collaborated to develop guidance  
332 informing health care providers that EVALI cases continue to occur and should be considered  
333 alongside other etiologies.[21]

334 The preponderance of preexisting and new mental health diagnoses among respondents  
335 also suggests that clinical follow up by behavioral health providers might be beneficial for  
336 addressing substance use and psychological trauma of injury, hospitalization, and any emotional  
337 and social adjustments to long-term physical impairments suffered by patients.

338

## 339 **Conclusion**

340 NYC residents with EVALI reported symptoms throughout the follow-up period, and  
341 approximately half reported new-onset morbidity. These findings have guided clinician  
342 education and public health messaging and might influence e-cigarette policy and individual  
343 health behaviors. Findings and follow-up have also guided surveillance efforts, both for other  
344 emerging products and for emerging injuries or illnesses that might result in chronic disease.  
345 Other studies are needed to understand long-term health of EVALI cases and to more fully  
346 understand causes of EVALI associated with various vaping products.

347

## 348 **Acknowledgments**

349 We wish to acknowledge Tabassum Z. Insaf, PhD, Monica P. Nordstrom, MSPH, from  
350 the New York State Department of Health, and Philip C. DiSalvo, MD, of the Carle Illinois

351 College of Medicine, formerly of the New York City Department of Health’s Poison Control  
352 Center and the staff of the Poison Control Center, for their exceptional assistance supporting our  
353 lung injury surveillance and identification of New York City EVALI cases in 2019. We also  
354 acknowledge Kim Kessler, JD, Assistant Commissioner of the Bureau of Chronic Disease  
355 Prevention (BCDP), New York City Department of Health and Jennifer G. Wright, DVM, MPH  
356 from the Centers for Disease Control and Prevention’s Division of Partnership Support (PHIC)  
357 and Division of Workforce Development (DWD) for their detailed manuscript reviews, edits and  
358 comments. We also thank Lourdes M. Cifuentes, MPH, of the Food Bank for New York City, a  
359 former BCDP staff member, who conducted interviews and supported the data collection process  
360 during the first wave of interviews.

361

## 362 **References**

- 363 1. U.S. Department of Health and Human Services, Centers for Disease Control and  
364 Prevention. Outbreak of Lung Injury Associated with the Use of E-Cigarette, or Vaping,  
365 Products 2020 [updated August 3, 2021. Available from:  
366 [https://www.cdc.gov/tobacco/basic\\_information/e-cigarettes/severe-lung-disease.html#map-](https://www.cdc.gov/tobacco/basic_information/e-cigarettes/severe-lung-disease.html#map-cases)  
367 [cases](https://www.cdc.gov/tobacco/basic_information/e-cigarettes/severe-lung-disease.html#map-cases)).
- 368 2. Evans ME, Twentyman E, Click ES, Goodman AB, Weissman DN, Kiernan E, et al.  
369 Update: Interim Guidance for Health Care Professionals Evaluating and Caring for Patients with  
370 Suspected E-cigarette, or Vaping, Product Use-Associated Lung Injury and for Reducing the  
371 Risk for Rehospitalization and Death Following Hospital Discharge - United States, December  
372 2019. *MMWR Morb Mortal Wkly Rep.* 2020;68(5152):1189-94.
- 373 3. Overbeek DL, Kass AP, Chiel LE, Boyer EW, Casey AMH. A review of toxic effects of  
374 electronic cigarettes/vaping in adolescents and young adults. *Crit Rev Toxicol.* 2020;50(6):531-  
375 8.
- 376 4. U.S. Department of Health and Human Services, Centers for Disease Control and  
377 Prevention. About Electronic Cigarettes (E-Cigarettes) [Available from:  
378 [https://www.cdc.gov/tobacco/basic\\_information/e-cigarettes/about-e-cigarettes.html](https://www.cdc.gov/tobacco/basic_information/e-cigarettes/about-e-cigarettes.html).
- 379 5. Belok SH, Parikh, R., Bernardo, J. et al. . E-cigarette, or vaping, product use-associated  
380 lung injury: a review. *Pneumonia* 2020(12):12.
- 381 6. Jatlaoui TC WJ, Kabbani S, et al. . Update: Interim Guidance for Health Care Providers  
382 for Managing Patients with Suspected E-cigarette, or Vaping, Product Use–Associated Lung  
383 Injury — United States, November 2019. *MMWR Morb Mortal Wkly Rep.* 2019(68):1081-6.

- 384 7. U.S. Department of Health and Human Services, Centers for Disease Control and  
385 Prevention. 2019 LUNG INJURY SURVEILLANCE PRIMARY CASE DEFINITIONS. 2019.
- 386 8. U.S. Department of Health and Human Services, Centers for Disease Control and  
387 Prevention. Lung Injury Associated with E-cigarette Use or Vaping | National Case Report Form.  
388 2019.
- 389 9. NYC Department of Health and Mental Hygiene. Community Health Survey Public Use  
390 Data [Available from: [https://www.nyc.gov/site/doh/data/data-sets/community-health-survey-  
391 public-use-data.page](https://www.nyc.gov/site/doh/data/data-sets/community-health-survey-public-use-data.page).
- 392 10. U.S. Department of Health and Human Services, Centers for Disease Control and  
393 Prevention. 2019 Youth Risk Behavior Survey Questionnaire.
- 394 11. U.S. Department of Health and Human Services, Substance Abuse and Mental Health  
395 Services Administration, Center for Behavioral Health Statistics and Quality. 2018 National  
396 Survey on Drug Use and Health Public Use File Codebook. Retrieved March 8, 2024 from  
397 [https://www.datafiles.samhsa.gov/sites/default/files/field-uploads-protected/studies/NSDUH-  
398 2018/NSDUH-2018-datasets/NSDUH-2018-DS0001/NSDUH-2018-DS0001-info/NSDUH-  
399 2018-DS0001-info-codebook.pdf](https://www.datafiles.samhsa.gov/sites/default/files/field-uploads-protected/studies/NSDUH-2018/NSDUH-2018-datasets/NSDUH-2018-DS0001/NSDUH-2018-DS0001-info/NSDUH-2018-DS0001-info-codebook.pdf)
- 400 12. David A. Siegel TCJ, Emily H. Koumans, Emily A. Kiernan, Mark Layer, Jordan E.  
401 Cates, Anne Kimball, David N. Weissman, Emily E. Petersen, Sarah Reagan-Steiner, Shana  
402 Godfred-Cato, Danielle Moulia, Erin Moritz, Jonathan D. Lehnert, Jane Mitchko, Joel London,  
403 Sherif R. Zaki, Brian A. King, Christopher M. Jones, Anita Patel, Dana Meaney Delman, Ram  
404 Koppaka, Lung Injury Response Clinical Working Group; Lung Injury Response  
405 Epidemiology/Surveillance Group. Update: Interim Guidance for Health Care Providers  
406 Evaluating and Caring for Patients with Suspected E-cigarette, or Vaping, Product Use  
407 Associated Lung Injury — United States, October 2019. DOI:  
408 <http://dx.doi.org/10.15585/mmwr.mm6841e3external> icon. MMWR Morb Mortal Wkly Rep.  
409 2019;68:919–27.
- 410 13. Marrocco A, Singh D, Christiani DC, Demokritou P. E-cigarette vaping associated acute  
411 lung injury (EVALI): state of science and future research needs. Crit Rev Toxicol.  
412 2022;52(3):188-220.
- 413 14. NYC Department of Health and Mental Hygiene. Community Health Survey 2017  
414 [Available from: [https://a816-  
415 health.nyc.gov/hdi/epiquery/visualizations?PageType=ts&PopulationSource=CHS&Topic=3&S  
416 ubtopic=20](https://a816-health.nyc.gov/hdi/epiquery/visualizations?PageType=ts&PopulationSource=CHS&Topic=3&Subtopic=20).
- 417 15. Sarvet AL, Wall MM, Keyes KM, Olfson M, Cerdá M, Hasin DS. Self-medication of  
418 mood and anxiety disorders with marijuana: Higher in states with medical marijuana laws. Drug  
419 Alcohol Depend. 2018;186:10-5.
- 420 16. Investing in the Health and Well-Being of Young Adults. Washington (DC): National  
421 Academies Press (US); 2015.
- 422 17. Blagev DP, Callahan SJ, Harris D, Collingridge DS, Hopkins RO, Eve JR, et al.  
423 Prospectively Assessed Long-Term Outcomes of Patients with E-Cigarette- or Vaping-associated  
424 Lung Injury. Ann Am Thorac Soc. 2022;19(11):1892-9.
- 425 18. Triantafyllou GA, Tiberio PJ, Zou RH, Lynch MJ, Kreit JW, McVerry BJ, et al. Long-  
426 term outcomes of EVALI: a 1-year retrospective study. Lancet Respir Med. 2021;9(12):e112-e3.
- 427 19. Cook LA, Sachs, J., & Weiskopf, N. G. . The quality of social determinants data in the  
428 electronic health record: a systematic review. Journal of the American Medical Informatics  
429 Association : JAMIA. 2021;29(1):187-96.

- 430 20. Cao DJ, Aldy K, Hsu S, McGetrick M, Verbeck G, De Silva I, et al. Review of Health  
431 Consequences of Electronic Cigarettes and the Outbreak of Electronic Cigarette, or Vaping,  
432 Product Use-Associated Lung Injury. *J Med Toxicol.* 2020;16(3):295-310.  
433 21. Letter to Health Care Providers. NYS Office of Cannabis Management; 2022.
-

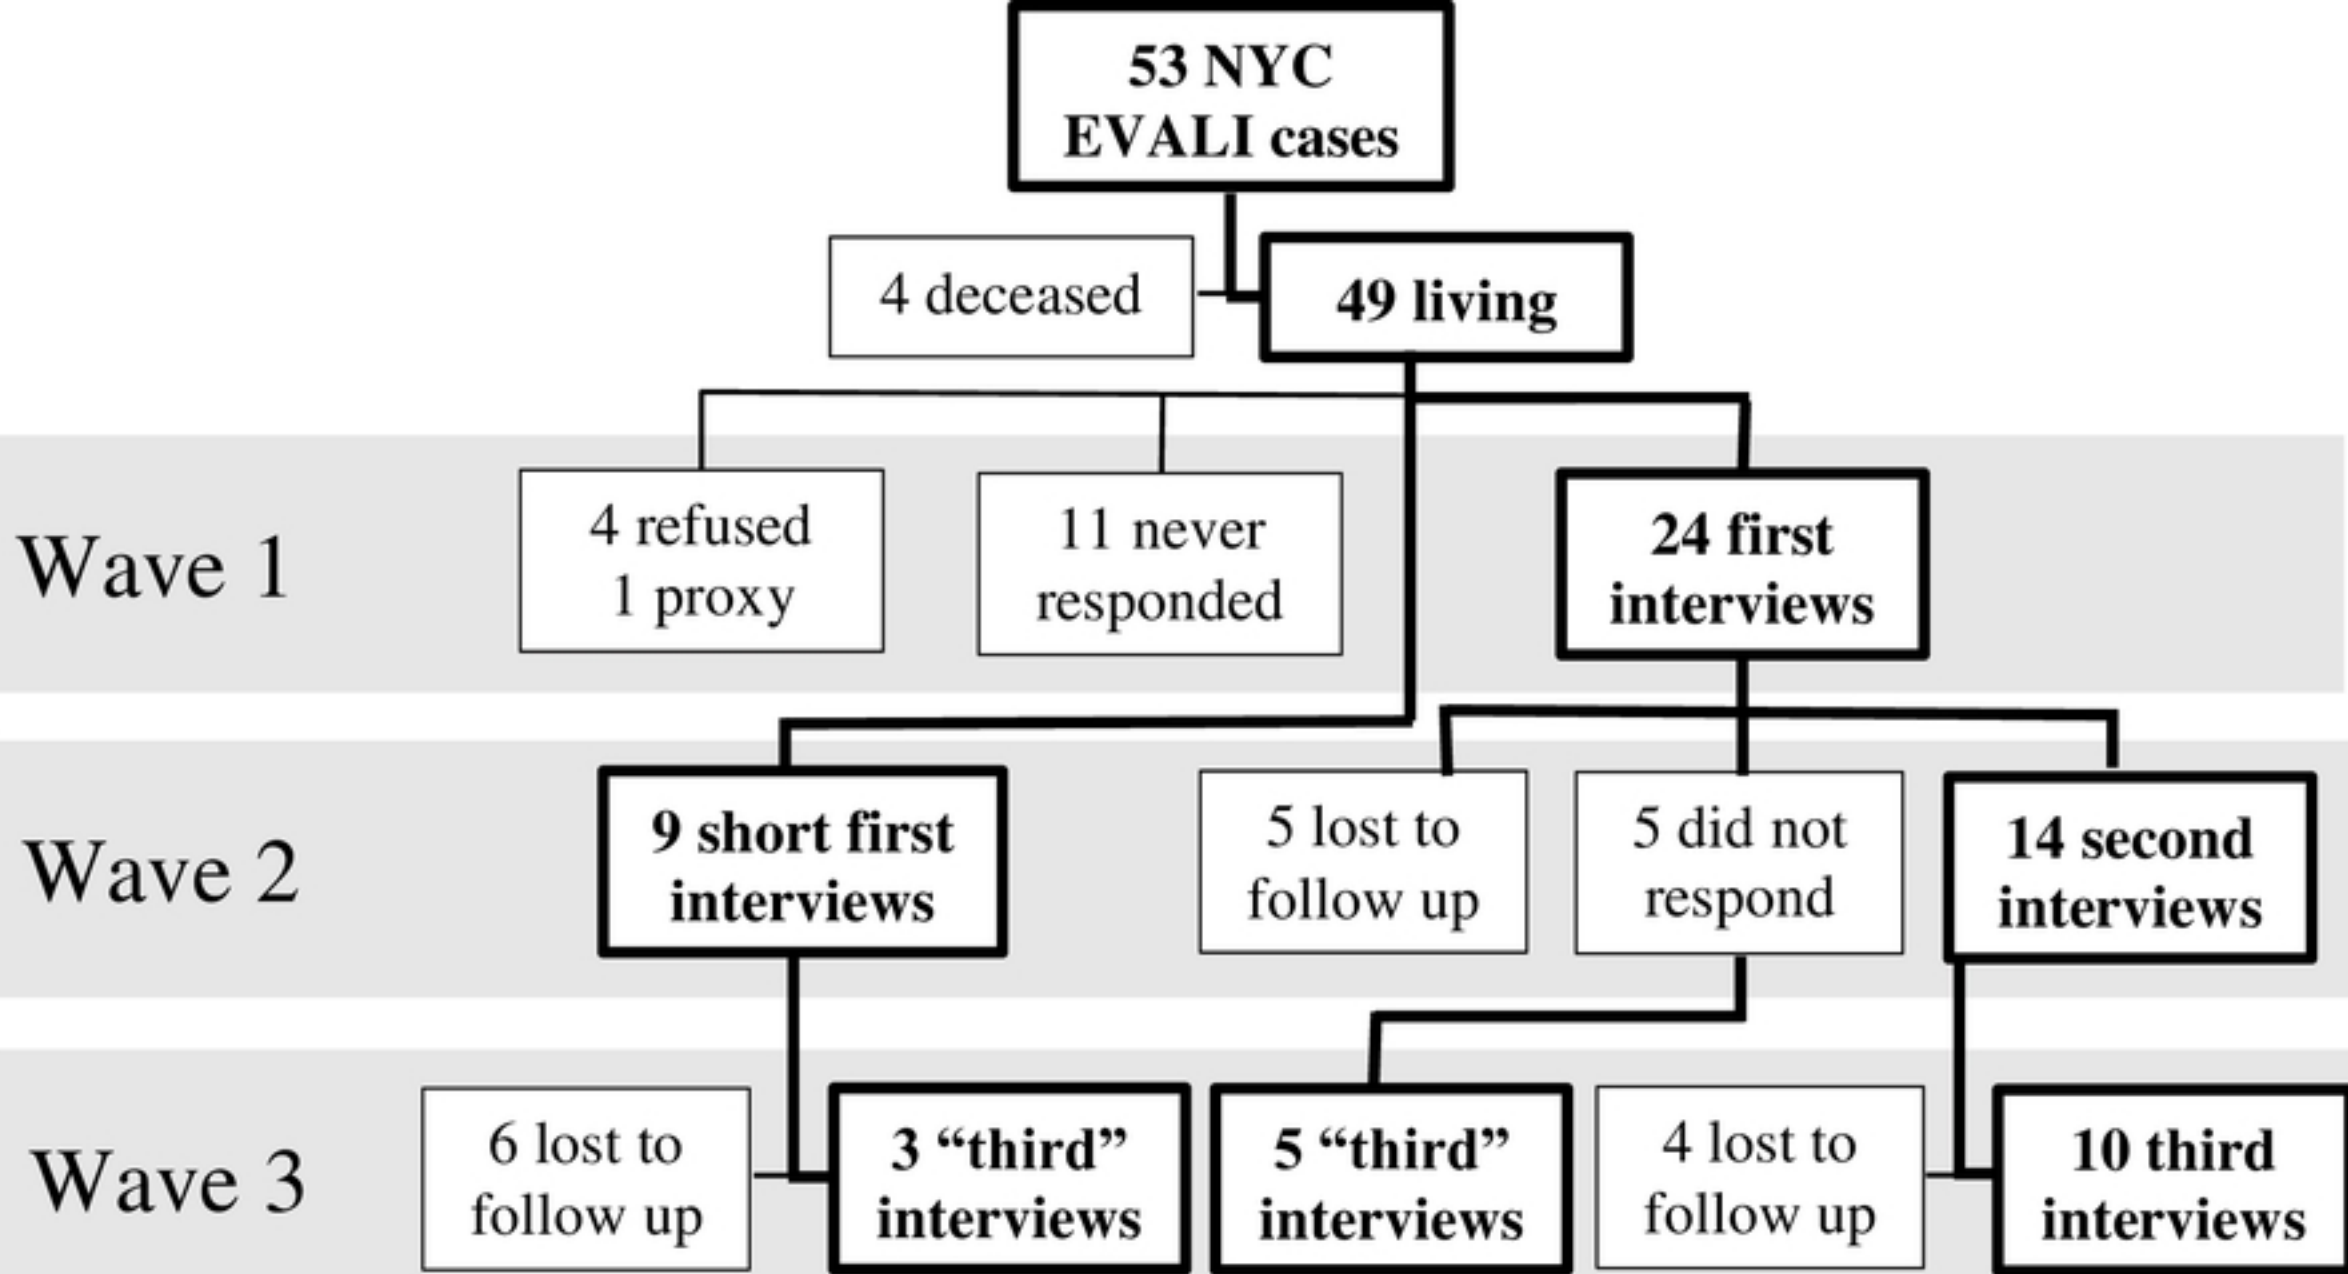

Figure 1



## New symptoms among ten respondents who participated in all three interviews

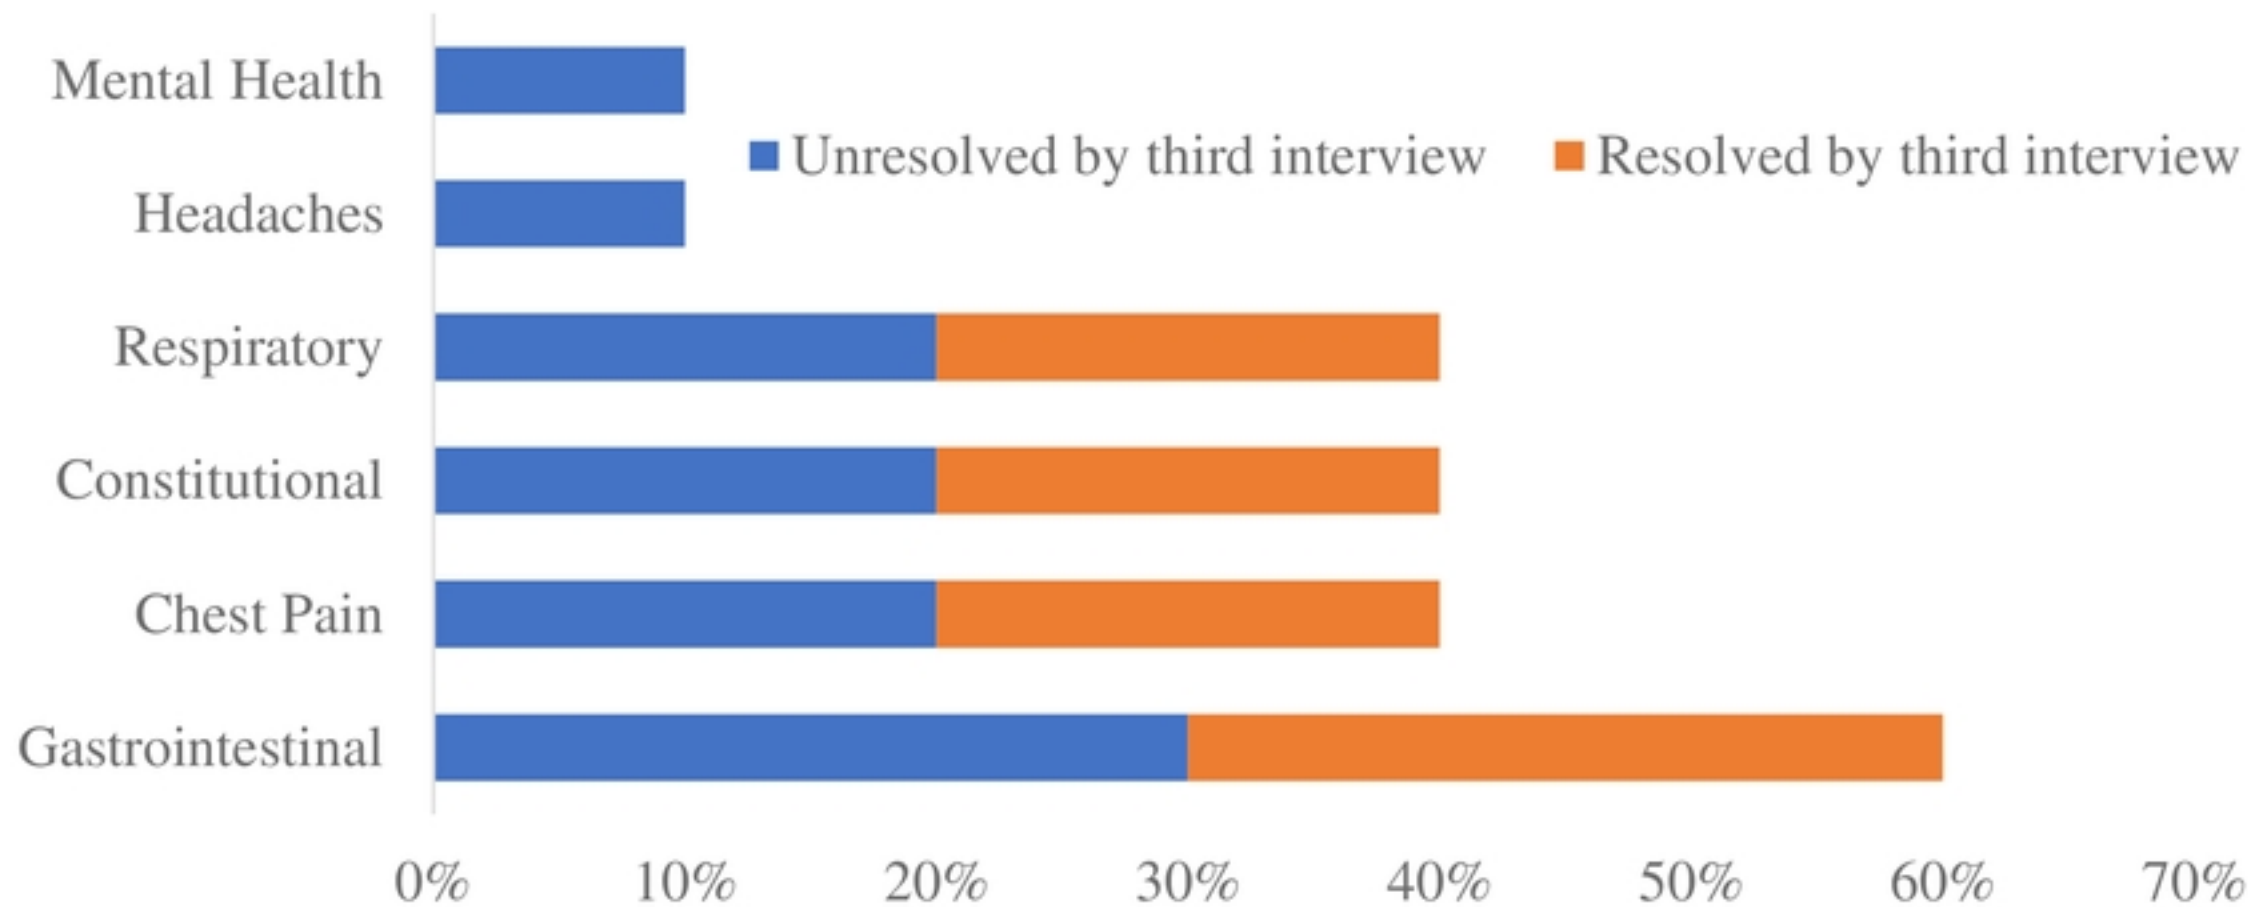

Figure 2
